# Supplementary material for: Methyl Salicylate Level Increase in Flax after Fusarium oxysporum Infection Is Associated with Phenylpropanoid Pathway Activation
Source: PubMed Central journal article supplement (PMC5247452; doi:10.3389/fpls.2016.01951), 2017-01-20
Supplement: Image1.pdf [file Image1.pdf]

A

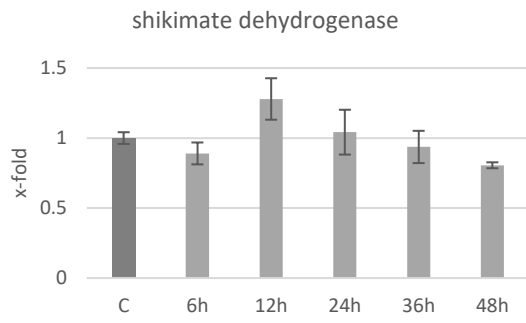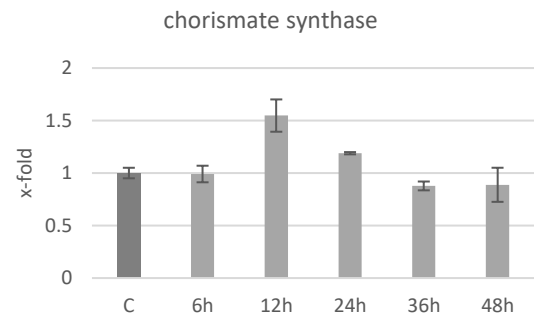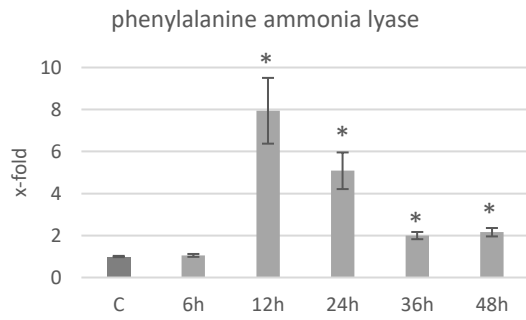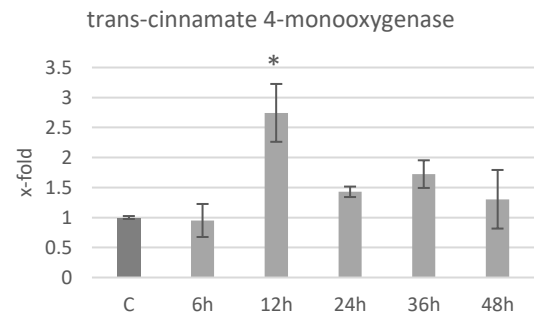

**B**

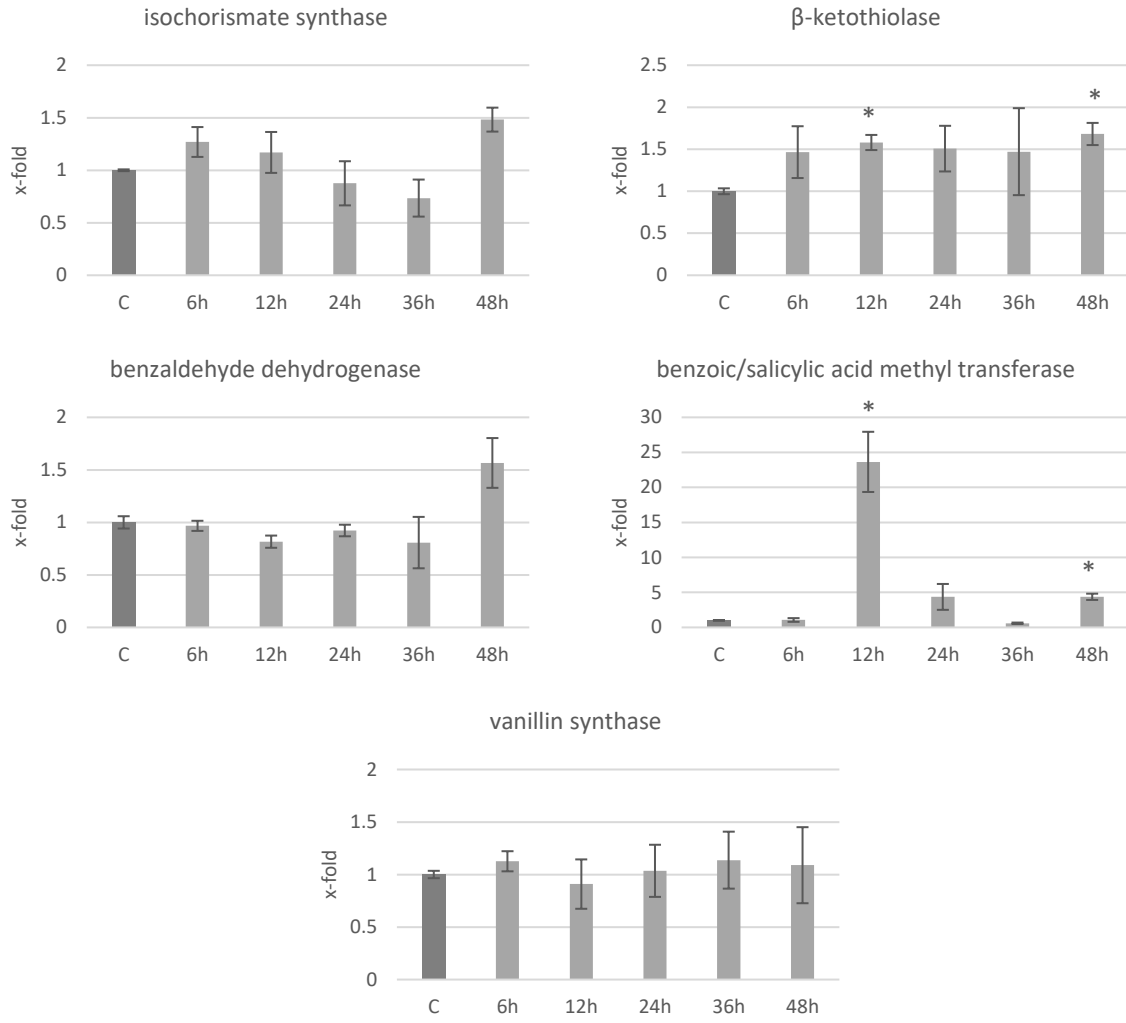

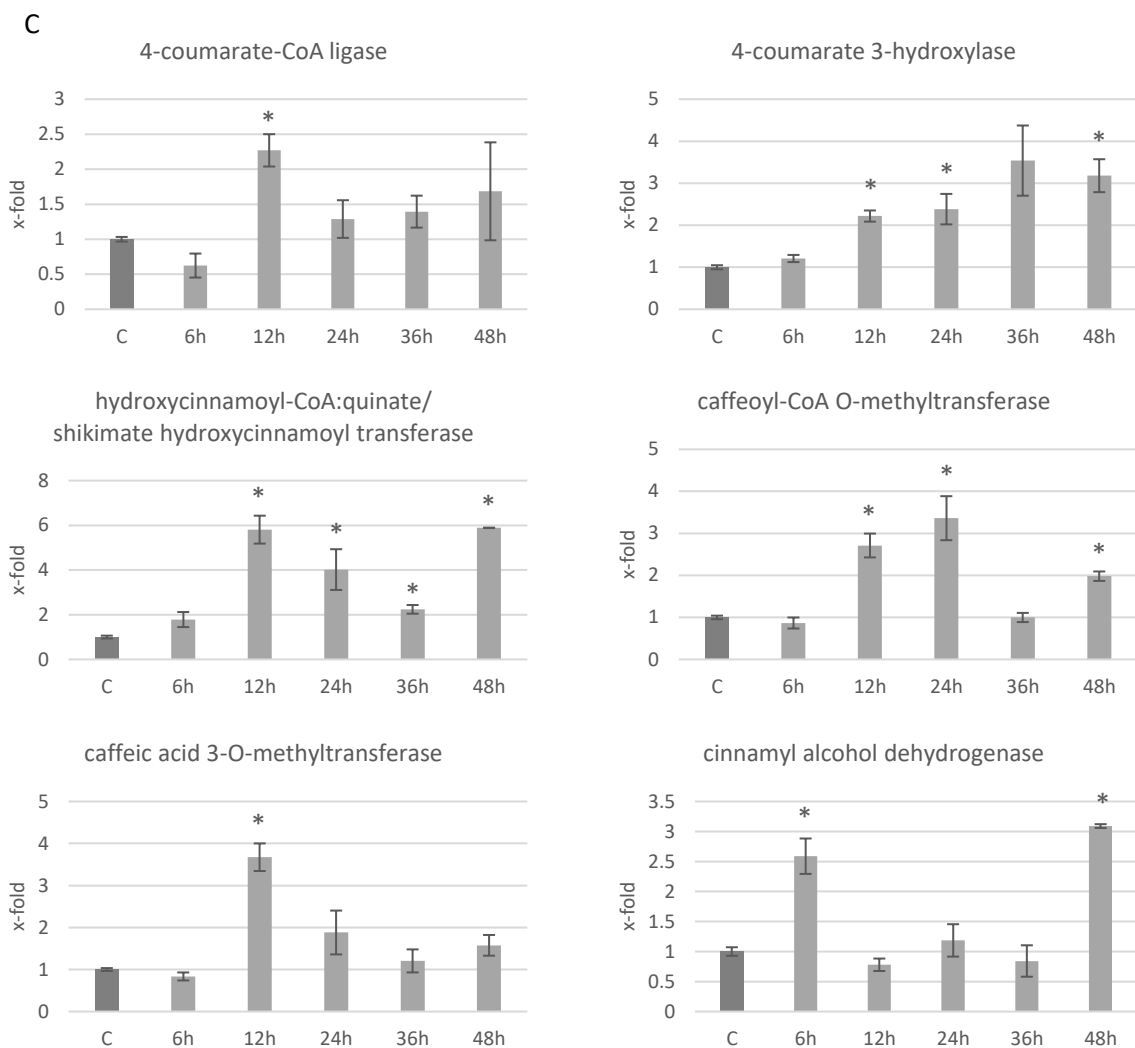

Supplementary Fig. 1. Levels of transcript of genes of the core route of the shikimate/phenylpropanoid pathway (A), the benzoate derivative biosynthesis route of the shikimate/phenylpropanoid pathway (B) and the hydroxycinnamic acid/lignin biosynthesis route of the shikimate/phenylpropanoid pathway (C) measured at 6, 12, 24, 36 and 48 hours after *F. oxysporum* infection relatively to control (marked C) (relative quantification, RQ=1). Actin was used as the reference gene. The results are presented as means  $\pm$  standard deviations of three independent repeats. Changes statistically significant at  $p < 0.05$  are marked with asterisks.
